# Supplementary material for: Preclinical Efficacy and Safety of an Anti-Human VEGFA and Anti-Human NRP1 Dual-Targeting Bispecific Antibody (IDB0076)
Source: PubMed Central journal article supplement (PMC7356919; doi:10.3390/biom10060919), 2020-06-17
Supplement: biomolecules-10-00919-s001.pdf [file biomolecules-10-00919-s001.pdf]

Supplementary Information

## Preclinical Efficacy and Safety of an Anti-human VEGFA and Anti-human NRP1 Dual-targeting Bispecific Antibody (IDB0076)

Jong-Hee Ko, Hyuk-Sang Kwon, Bomin Kim, Gihong Min, Chorong Shin, Seok-Woo Yang, Seong Wook Lee, Youngmin Lee, Dahae Hong, and Yong-Sung Kim

### Supplementary Materials and Methods

#### *A NRP1 Internalization Assay*

PANC-1 cells (cat. # CRL-1469, ATCC) grown overnight on 8-well chamber slide (Ibidi) were washed, incubated in serum-free DMEM media for 30 minutes at 37 °C, and then treated with 2 μM IDB0076 or bevacizumab for 1 h at 4 °C or 37 °C. The slides were stained with an anti-neuropilin 1 antibody (cat. # ab81321, Abcam) and an anti-human IgG1 PE-conjugated antibody (cat. # IC002P, R&D systems). The secondary antibody was a goat anti-rabbit IgG Alexa Fluor 594-conjugated antibody (cat. # A11037, Thermo Fisher). Images were captured via confocal microscopy (Carl Zeiss) and were subjected to Zen 2.3 Blue edition analysis (Carl Zeiss).

#### Supplementary Figure S1

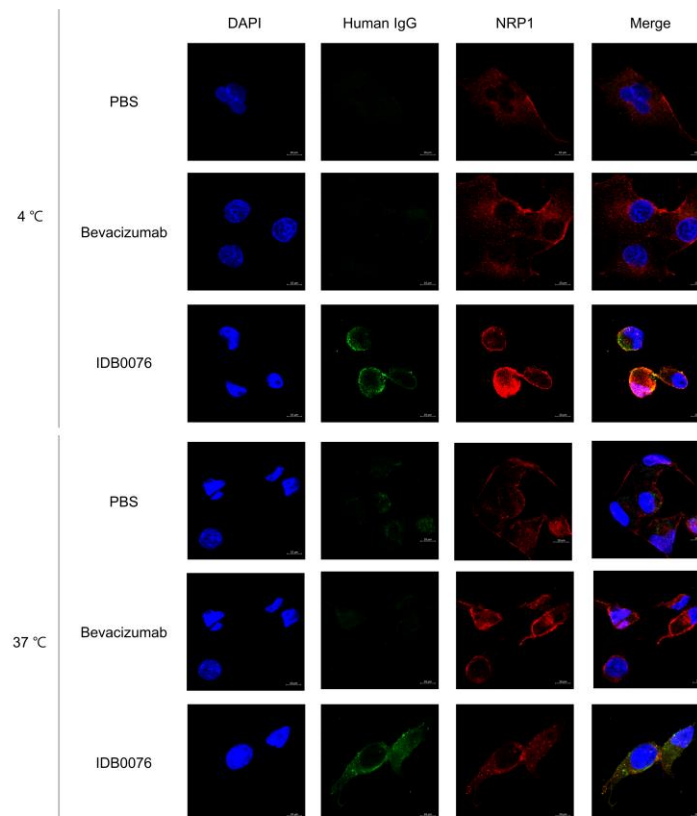

IDB0076 downregulates the cell surface levels of NRP1 in PANC-1 cells. Colocalization with cell-surface expressed NRP1 (red) at 4 °C (upper panels) and NRP1-mediated internalization at 37 °C (bottom panels) of IDB0076 in PANC-1 cells, assessed by confocal fluorescence microscopy. The cells were treated with IDB0076 or bevacizumab (2 μM) for 1 h at 4 °C or 37 °C. Nuclei were co-stained with DAPI (blue). Magnification: ×80, scale bar: 10 μm.

Supplementary Table S1

Hematology in cynomolgus monkeys that received IDB0076

| Sex     | Dose              | RBC (10 <sup>6</sup> /μL)   |               |                 | HGB (g/dL)                    |               |                 | HCT (%)                       |               |                 | MCV (fL)                     |               |                 |
|---------|-------------------|-----------------------------|---------------|-----------------|-------------------------------|---------------|-----------------|-------------------------------|---------------|-----------------|------------------------------|---------------|-----------------|
|         |                   | Pre                         | End of dosing | End of recovery | Pre                           | End of dosing | End of recovery | Pre                           | End of dosing | End of recovery | Pre                          | End of dosing | End of recovery |
| Males   | 2 mg/kg           | 5.59                        | 5.86          | N/A             | 13.8                          | 14.3          | N/A             | 43.8                          | 45.1          | N/A             | 78.4                         | 77.0          | N/A             |
|         | 10 mg/kg          | 6.14                        | 6.19          | N/A             | 13.7                          | 13.9          | N/A             | 42.7                          | 43.5          | N/A             | 69.5                         | 70.3          | N/A             |
|         | 50 mg/kg          | 5.53                        | 6.13          | N/A             | 13.1                          | 14.2          | N/A             | 40.3                          | 44.5          | N/A             | 72.9                         | 72.6          | N/A             |
|         | 50 mg/kg-recovery | 6.14                        | 6.62          | 6.27            | 12.8                          | 13.7          | 13.2            | 41.8                          | 43.9          | 42.5            | 68.1                         | 66.3          | 67.8            |
| Females | 2 mg/kg           | 5.38                        | 5.39          | N/A             | 12.9                          | 13.2          | N/A             | 40.2                          | 41.2          | N/A             | 74.7                         | 76.4          | N/A             |
|         | 10 mg/kg          | 5.77                        | 6.27          | N/A             | 13.4                          | 14.4          | N/A             | 42.1                          | 44.6          | N/A             | 73.0                         | 71.1          | N/A             |
|         | 50 mg/kg          | 5.09                        | 5.94          | N/A             | 12.5                          | 14.5          | N/A             | 38.7                          | 44.1          | N/A             | 76.0                         | 74.2          | N/A             |
|         | 50 mg/kg-recovery | 5.19                        | 5.94          | 5.70            | 12.7                          | 14.3          | 13.8            | 40.3                          | 45.1          | 42.7            | 77.6                         | 75.9          | 74.9            |
| Sex     | Dose              | MCH (pg)                    |               |                 | MCHC (g/dL)                   |               |                 | PLT (10 <sup>3</sup> /μL)     |               |                 | RET (%)                      |               |                 |
|         |                   | Pre                         | End of dosing | End of recovery | Pre                           | End of dosing | End of recovery | Pre                           | End of dosing | End of recovery | Pre                          | End of dosing | End of recovery |
| Males   | 2 mg/kg           | 24.7                        | 24.4          | N/A             | 31.5                          | 31.7          | N/A             | 342                           | 323           | N/A             | 0.73                         | 0.62          | N/A             |
|         | 10 mg/kg          | 22.3                        | 22.5          | N/A             | 32.1                          | 32.0          | N/A             | 285                           | 298           | N/A             | 0.44                         | 0.71          | N/A             |
|         | 50 mg/kg          | 23.7                        | 23.2          | N/A             | 32.5                          | 31.9          | N/A             | 332                           | 277           | N/A             | 0.42                         | 0.79          | N/A             |
|         | 50 mg/kg-recovery | 20.8                        | 20.7          | 21.1            | 30.6                          | 31.2          | 31.1            | 314                           | 298           | 284             | 0.75                         | 0.57          | 0.80            |
| Females | 2 mg/kg           | 24.0                        | 24.5          | N/A             | 32.1                          | 32.0          | N/A             | 505                           | 446           | N/A             | 0.37                         | 0.38          | N/A             |
|         | 10 mg/kg          | 23.2                        | 23.0          | N/A             | 31.8                          | 32.3          | N/A             | 321                           | 326           | N/A             | 0.55                         | 0.44          | N/A             |
|         | 50 mg/kg          | 24.6                        | 24.4          | N/A             | 32.3                          | 32.9          | N/A             | 389                           | 227           | N/A             | 0.52                         | 0.69          | N/A             |
|         | 50 mg/kg-recovery | 24.5                        | 24.1          | 24.2            | 31.5                          | 31.7          | 32.3            | 407                           | 284           | 401             | 1.34                         | 1.25          | 0.80            |
| Sex     | Dose              | RET. (10 <sup>3</sup> /μL)  |               |                 | WBC (10 <sup>3</sup> /μL)     |               |                 | Neutro. (10 <sup>3</sup> /μL) |               |                 | Lymph. (10 <sup>3</sup> /μL) |               |                 |
|         |                   | Pre                         | End of dosing | End of recovery | Pre                           | End of dosing | End of recovery | Pre                           | End of dosing | End of recovery | Pre                          | End of dosing | End of recovery |
| Males   | 2 mg/kg           | 40.8                        | 36.3          | N/A             | 6.97                          | 6.61          | N/A             | 2.38                          | 1.70          | N/A             | 3.92                         | 4.03          | N/A             |
|         | 10 mg/kg          | 27.0                        | 43.9          | N/A             | 5.46                          | 5.57          | N/A             | 1.77                          | 1.61          | N/A             | 3.42                         | 3.61          | N/A             |
|         | 50 mg/kg          | 23.2                        | 48.4          | N/A             | 9.64                          | 11.02         | N/A             | 4.88                          | 3.62          | N/A             | 4.11                         | 6.41          | N/A             |
|         | 50 mg/kg-recovery | 46.0                        | 37.7          | 50.2            | 18.43                         | 20.43         | 23.60           | 3.56                          | 5.00          | 3.69            | 13.05                        | 13.46         | 17.10           |
| Females | 2 mg/kg           | 19.9                        | 20.5          | N/A             | 9.08                          | 12.81         | N/A             | 5.90                          | 8.23          | N/A             | 2.62                         | 3.84          | N/A             |
|         | 10 mg/kg          | 31.7                        | 27.6          | N/A             | 14.75                         | 11.84         | N/A             | 9.73                          | 5.89          | N/A             | 3.95                         | 5.19          | N/A             |
|         | 50 mg/kg          | 26.5                        | 41.0          | N/A             | 8.20                          | 5.76          | N/A             | 4.33                          | 1.15          | N/A             | 3.51                         | 4.09          | N/A             |
|         | 50 mg/kg-recovery | 69.5                        | 74.3          | 45.6            | 6.77                          | 10.05         | 9.21            | 2.97                          | 1.87          | 2.21            | 3.45                         | 7.42          | 6.54            |
| Sex     | Dose              | Mono. (10 <sup>3</sup> /μL) |               |                 | Eosino. (10 <sup>3</sup> /μL) |               |                 | Baso. (10 <sup>3</sup> /μL)   |               |                 | Neutro. (%)                  |               |                 |
|         |                   | Pre                         | End of dosing | End of recovery | Pre                           | End of dosing | End of recovery | Pre                           | End of dosing | End of recovery | Pre                          | End of dosing | End of recovery |
| Males   | 2 mg/kg           | 0.53                        | 0.64          | N/A             | 0.14                          | 0.23          | N/A             | 0.00                          | 0.01          | N/A             | 34.2                         | 25.6          | N/A             |
|         | 10 mg/kg          | 0.25                        | 0.25          | N/A             | 0.02                          | 0.09          | N/A             | 0.00                          | 0.01          | N/A             | 32.4                         | 28.9          | N/A             |
|         | 50 mg/kg          | 0.52                        | 0.77          | N/A             | 0.12                          | 0.20          | N/A             | 0.01                          | 0.02          | N/A             | 50.7                         | 32.8          | N/A             |
|         | 50 mg/kg-recovery | 1.69                        | 1.67          | 2.63            | 0.11                          | 0.28          | 0.15            | 0.02                          | 0.02          | 0.03            | 19.3                         | 24.4          | 15.7            |
| Females | 2 mg/kg           | 0.50                        | 0.64          | N/A             | 0.05                          | 0.09          | N/A             | 0.01                          | 0.01          | N/A             | 64.9                         | 64.2          | N/A             |
|         | 10 mg/kg          | 1.00                        | 0.66          | N/A             | 0.06                          | 0.09          | N/A             | 0.01                          | 0.01          | N/A             | 65.9                         | 49.7          | N/A             |
|         | 50 mg/kg          | 0.30                        | 0.34          | N/A             | 0.06                          | 0.17          | N/A             | 0.00                          | 0.01          | N/A             | 52.8                         | 19.9          | N/A             |
|         | 50 mg/kg-recovery | 0.34                        | 0.58          | 0.43            | 0.01                          | 0.17          | 0.03            | 0.00                          | 0.01          | 0.00            | 43.9                         | 18.6          | 24.0            |
| Sex     | Dose              | Lymph. (%)                  |               |                 | Mono. (%)                     |               |                 | Eosino. (%)                   |               |                 | Baso. (%)                    |               |                 |
|         |                   | Pre                         | End of dosing | End of recovery | Pre                           | End of dosing | End of recovery | Pre                           | End of dosing | End of recovery | Pre                          | End of dosing | End of recovery |
| Males   | 2 mg/kg           | 56.2                        | 61.0          | N/A             | 7.6                           | 9.7           | N/A             | 2.0                           | 3.5           | N/A             | 0.0                          | 0.2           | N/A             |

|         |                   |        |               |                 |          |               |                 |     |     |     |     |     |     |
|---------|-------------------|--------|---------------|-----------------|----------|---------------|-----------------|-----|-----|-----|-----|-----|-----|
|         | 10 mg/kg          | 62.3   | 64.8          | N/A             | 4.6      | 4.5           | N/A             | 0.4 | 1.6 | N/A | 0.0 | 0.2 | N/A |
|         | 50 mg/kg          | 42.6   | 58.2          | N/A             | 5.4      | 7.0           | N/A             | 1.2 | 1.8 | N/A | 0.1 | 0.2 | N/A |
|         | 50 mg/kg-recovery | 70.8   | 65.9          | 72.5            | 9.2      | 8.2           | 11.1            | 0.6 | 1.4 | 0.6 | 0.1 | 0.1 | 0.1 |
| Females | 2 mg/kg           | 28.9   | 30.0          | N/A             | 5.5      | 5.0           | N/A             | 0.6 | 0.7 | N/A | 0.1 | 0.1 | N/A |
|         | 10 mg/kg          | 26.8   | 43.8          | N/A             | 6.8      | 5.6           | N/A             | 0.4 | 0.8 | N/A | 0.1 | 0.1 | N/A |
|         | 50 mg/kg          | 42.8   | 71.0          | N/A             | 3.7      | 5.9           | N/A             | 0.7 | 3.0 | N/A | 0.0 | 0.2 | N/A |
|         | 50 mg/kg-recovery | 51.0   | 73.8          | 71.0            | 5.0      | 5.8           | 4.7             | 0.1 | 1.7 | 0.3 | 0.0 | 0.1 | 0.0 |
| Sex     | Dose              | PT (s) |               |                 | APTT (s) |               |                 |     |     |     |     |     |     |
|         |                   | Pre    | End of dosing | End of recovery | Pre      | End of dosing | End of recovery |     |     |     |     |     |     |
| Males   | 2 mg/kg           | 10.3   | 10.6          | N/A             | 16.5     | 17.2          | N/A             |     |     |     |     |     |     |
|         | 10 mg/kg          | 9.8    | 9.9           | N/A             | 16.1     | 16.2          | N/A             |     |     |     |     |     |     |
|         | 50 mg/kg          | 9.8    | 9.7           | N/A             | 16.2     | 17.2          | N/A             |     |     |     |     |     |     |
|         | 50 mg/kg-recovery | 10.0   | 9.9           | 9.8             | 19.9     | 19.7          | 19.5            |     |     |     |     |     |     |
| Females | 2 mg/kg           | 9.9    | 9.8           | N/A             | 21.3     | 20.0          | N/A             |     |     |     |     |     |     |
|         | 10 mg/kg          | 9.8    | 10.0          | N/A             | 20.4     | 20.4          | N/A             |     |     |     |     |     |     |
|         | 50 mg/kg          | 10.2   | 9.9           | N/A             | 22.1     | 22.7          | N/A             |     |     |     |     |     |     |
|         | 50 mg/kg-recovery | 10.3   | 10.1          | 10.2            | 16.5     | 18.3          | 16.5            |     |     |     |     |     |     |

RBC: erythrocyte count, HGB: hemoglobin concentration, HCT: hematocrit value, MCV: mean corpuscular volume, MCH: mean corpuscular hemoglobin, MCHC: mean corpuscular hemoglobin concentration, PLT: platelet count, RET.: reticulocyte count, WBC: leukocyte count, Neutro.: neutrophil count, Lymph.: lymphocyte count, Mono.: monocyte count, Eosino.: eosinophil count, Baso.: basophil count, PT: prothrombin time, APTT: activated partial thromboplastin time

### Supplementary Table S2

Absolute and relative organ weights in cynomolgus monkeys that received IDB0076

| Absolute organ weights |                   |                   |               |               |                  |              |             |
|------------------------|-------------------|-------------------|---------------|---------------|------------------|--------------|-------------|
| Sex                    | Dose              | Pituitary (mg)    | Thymus (g)    | Spleen (g)    | Brain (g)        | Heart (g)    | Lung (g)    |
| Males                  | 2 mg/kg           | 43                | 2.8           | 2.8           | 60.3             | 10.4         | 12.3        |
|                        | 10 mg/kg          | 29                | 1.5           | 3.3           | 67.3             | 9.8          | 11.0        |
|                        | 50 mg/kg          | 43                | 2.1           | 3.8           | 69.3             | 10.6         | 12.5        |
|                        | 50 mg/kg-recovery | 40                | 3.7           | 5.4           | 66.6             | 8.3          | 13.7        |
| Females                | 2 mg/kg           | 49                | 1.6           | 3.4           | 61.4             | 9.1          | 13.4        |
|                        | 10 mg/kg          | 56                | 2.1           | 3.3           | 57.9             | 9.9          | 10.7        |
|                        | 50 mg/kg          | 66                | 1.2           | 5.9           | 59.4             | 8.4          | 14.2        |
|                        | 50 mg/kg-recovery | 59                | 1.6           | 2.1           | 66.5             | 9.4          | 14.4        |
| Sex                    | Dose              | Liver (g)         | Kidneys (g)   | Testes (g)    | Epididymides (g) | Ovaries (g)  | Uterus (g)  |
| Males                  | 2 mg/kg           | 56.6              | 10.7          | 1.8           | 0.6              | N/A          | N/A         |
|                        | 10 mg/kg          | 44.3              | 11.7          | 1.3           | 0.4              | N/A          | N/A         |
|                        | 50 mg/kg          | 69.9              | 12.2          | 1.7           | 0.7              | N/A          | N/A         |
|                        | 50 mg/kg-recovery | 57.2              | 12.1          | 2.0           | 0.7              | N/A          | N/A         |
| Females                | 2 mg/kg           | 68.0              | 12.7          | N/A           | N/A              | 0.15         | 4.0         |
|                        | 10 mg/kg          | 49.8              | 9.7           | N/A           | N/A              | 0.15         | 7.1         |
|                        | 50 mg/kg          | 49.4              | 10.2          | N/A           | N/A              | 0.25         | 5.4         |
|                        | 50 mg/kg-recovery | 53.6              | 10.5          | N/A           | N/A              | 0.33         | 5.4         |
| Relative organ weights |                   |                   |               |               |                  |              |             |
| Sex                    | Dose              | Pituitary (mg/kg) | Thymus (g/kg) | Spleen (g/kg) | Brain (g/kg)     | Heart (g/kg) | Lung (g/kg) |
| Males                  | 2 mg/kg           | 14.9              | 0.97          | 0.97          | 20.87            | 3.60         | 4.26        |
|                        | 10 mg/kg          | 11.3              | 0.59          | 1.29          | 26.29            | 3.83         | 4.30        |

|         | 50 mg/kg          | 14.0            | 0.68              | 1.24             | 22.57                  | 3.45              | 4.07             |
|---------|-------------------|-----------------|-------------------|------------------|------------------------|-------------------|------------------|
|         | 50 mg/kg-recovery | 15.2            | 1.40              | 2.05             | 25.23                  | 3.14              | 5.19             |
| Females | 2 mg/kg           | 17.4            | 0.57              | 1.21             | 21.85                  | 3.24              | 4.77             |
|         | 10 mg/kg          | 20.2            | 0.76              | 1.19             | 20.90                  | 3.57              | 3.86             |
|         | 50 mg/kg          | 24.9            | 0.45              | 2.23             | 22.42                  | 3.17              | 5.36             |
|         | 50 mg/kg-recovery | 21.8            | 0.59              | 0.77             | 24.54                  | 3.47              | 5.31             |
| Sex     | Dose              | Liver<br>(g/kg) | Kidneys<br>(g/kg) | Testes<br>(g/kg) | Epididymides<br>(g/kg) | Ovaries<br>(g/kg) | Uterus<br>(g/kg) |
| Males   | 2 mg/kg           | 19.58           | 3.70              | 0.62             | 0.21                   | N/A               | N/A              |
|         | 10 mg/kg          | 17.30           | 4.57              | 0.51             | 0.16                   | N/A               | N/A              |
|         | 50 mg/kg          | 22.77           | 3.97              | 0.55             | 0.23                   | N/A               | N/A              |
|         | 50 mg/kg-recovery | 21.67           | 4.58              | 0.76             | 0.27                   | N/A               | N/A              |
| Females | 2 mg/kg           | 24.20           | 4.52              | N/A              | N/A                    | 0.053             | 1.42             |
|         | 10 mg/kg          | 17.98           | 3.50              | N/A              | N/A                    | 0.054             | 2.56             |
|         | 50 mg/kg          | 18.64           | 3.85              | N/A              | N/A                    | 0.094             | 2.04             |
|         | 50 mg/kg-recovery | 19.78           | 3.87              | N/A              | N/A                    | 0.122             | 1.99             |

N/A: not applicable
